# Supplementary material
Source: PubMed Central journal article supplement (PMC8956004)

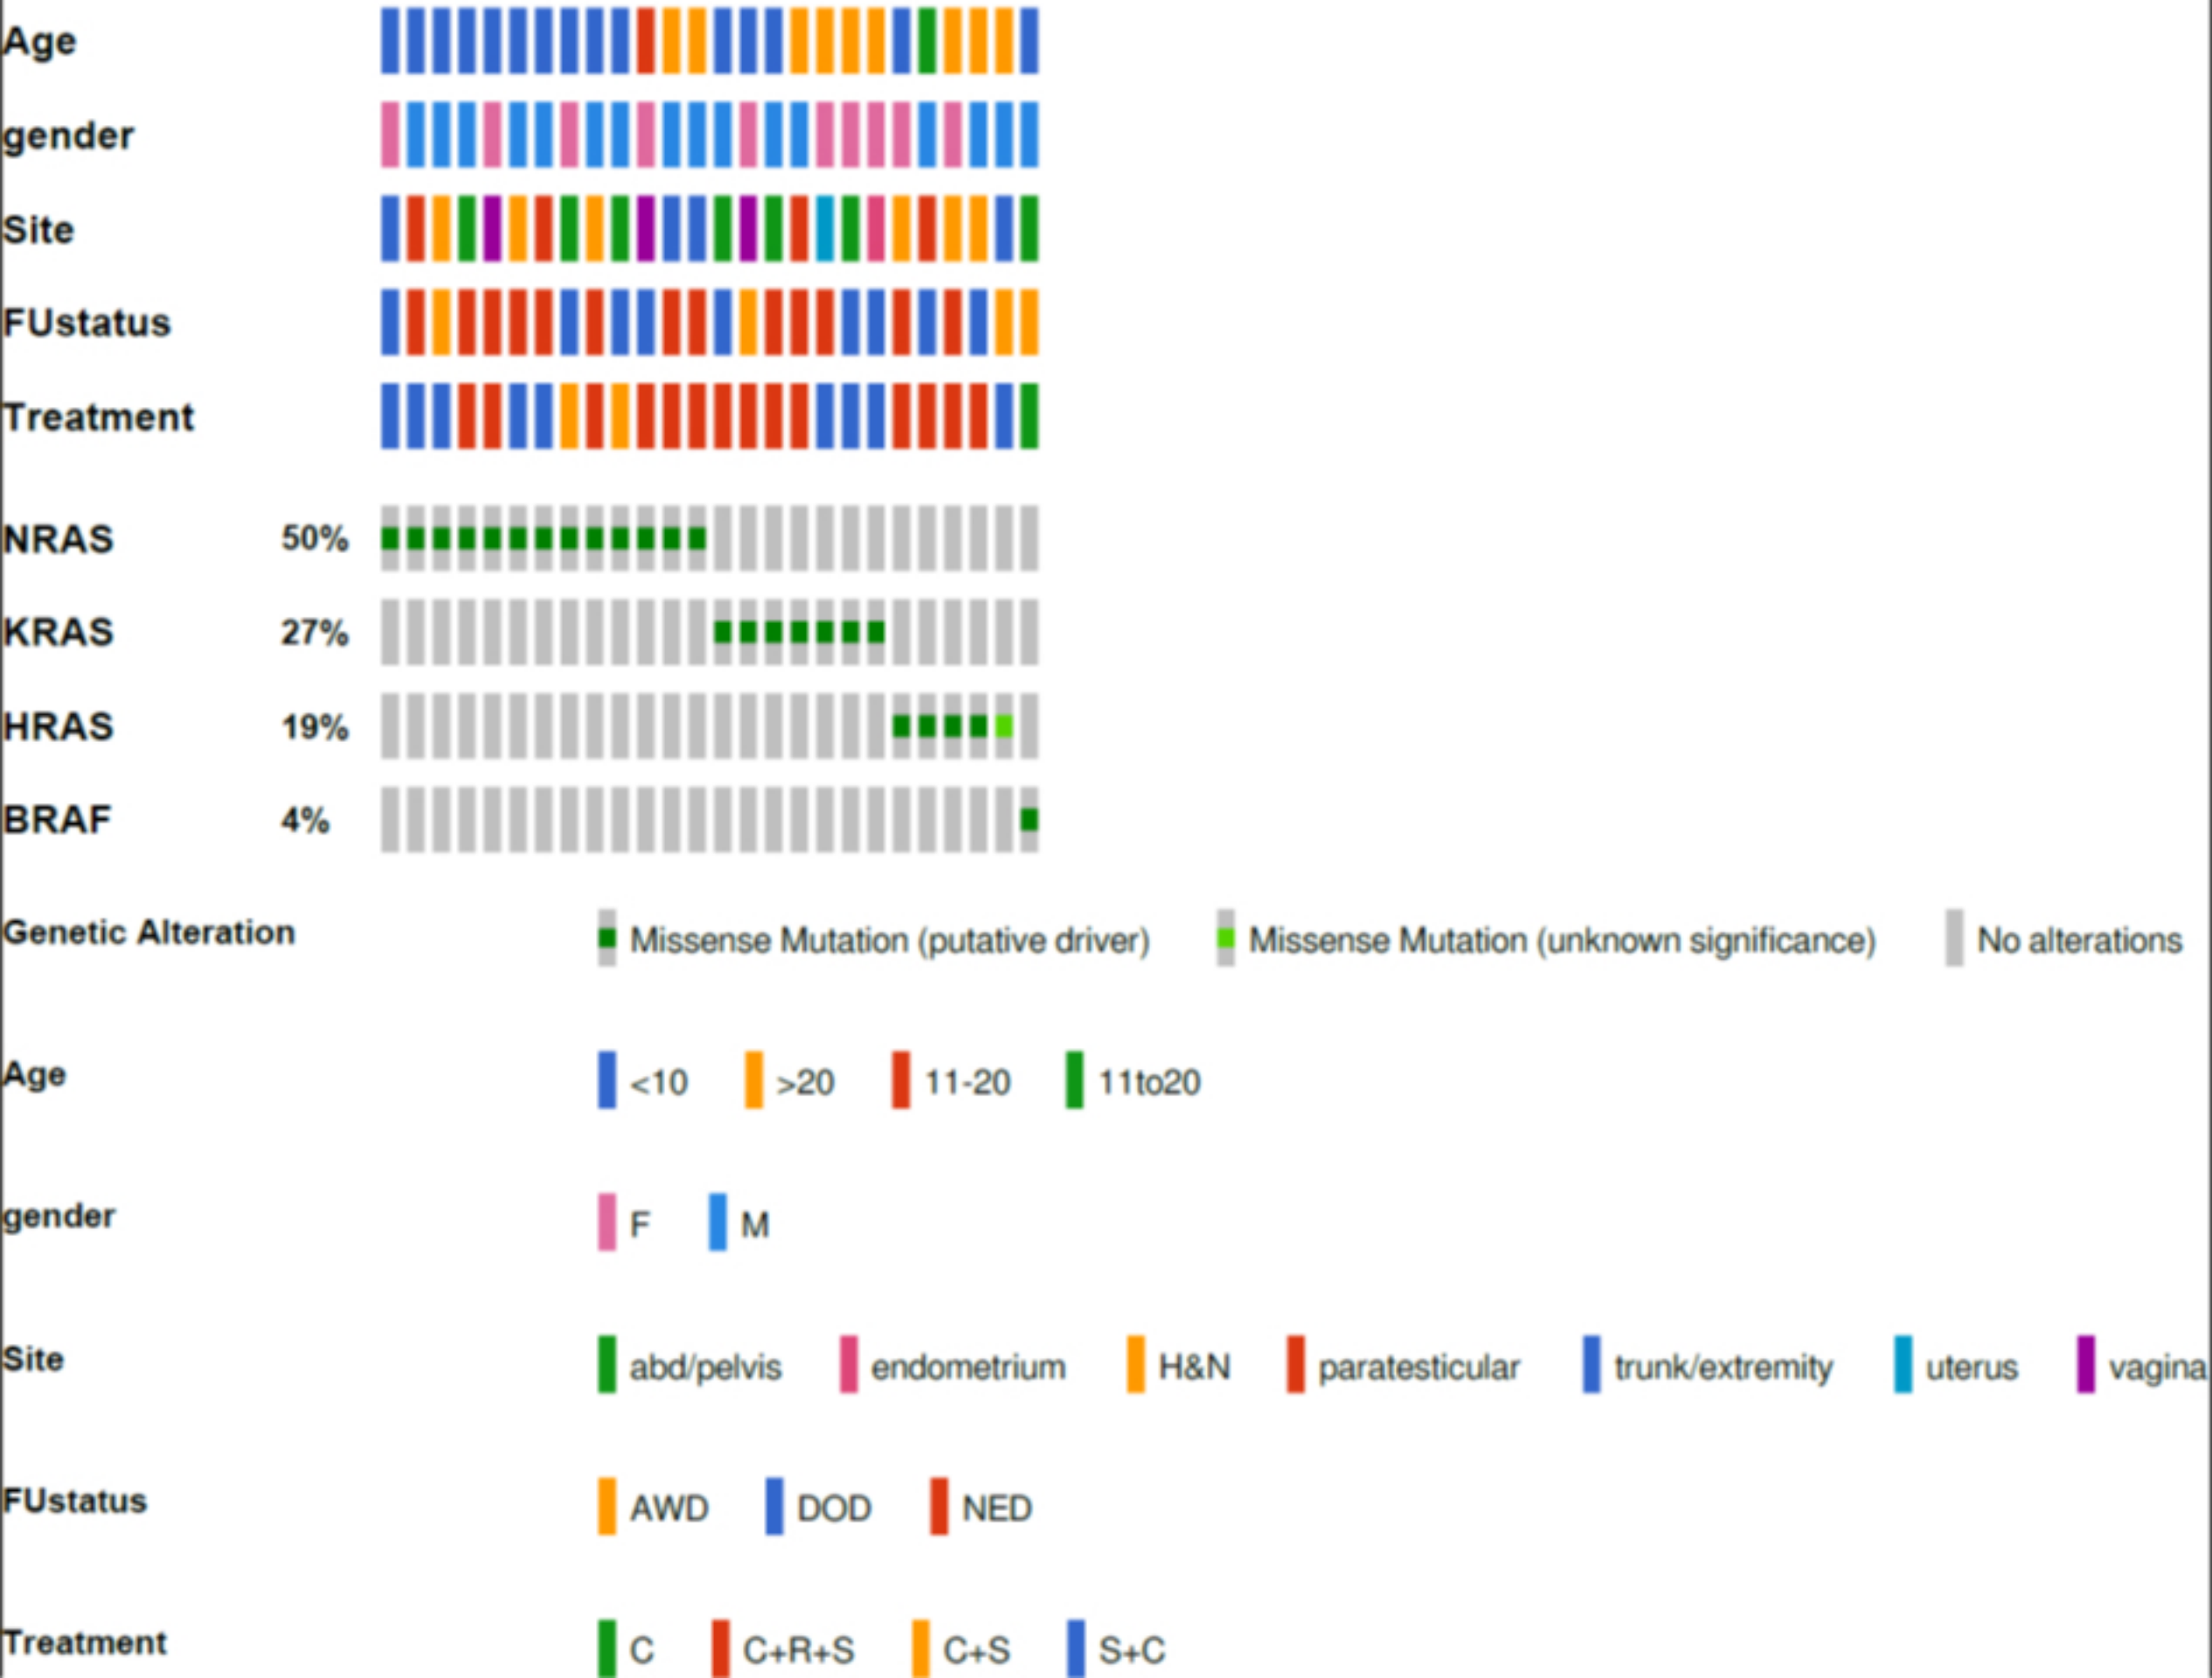

Supplement: NIHMS1787048-supplement-fS1.pdf [file NIHMS1787048-supplement-fS1.pdf]

## Survival of *RAS*-mutated RMS

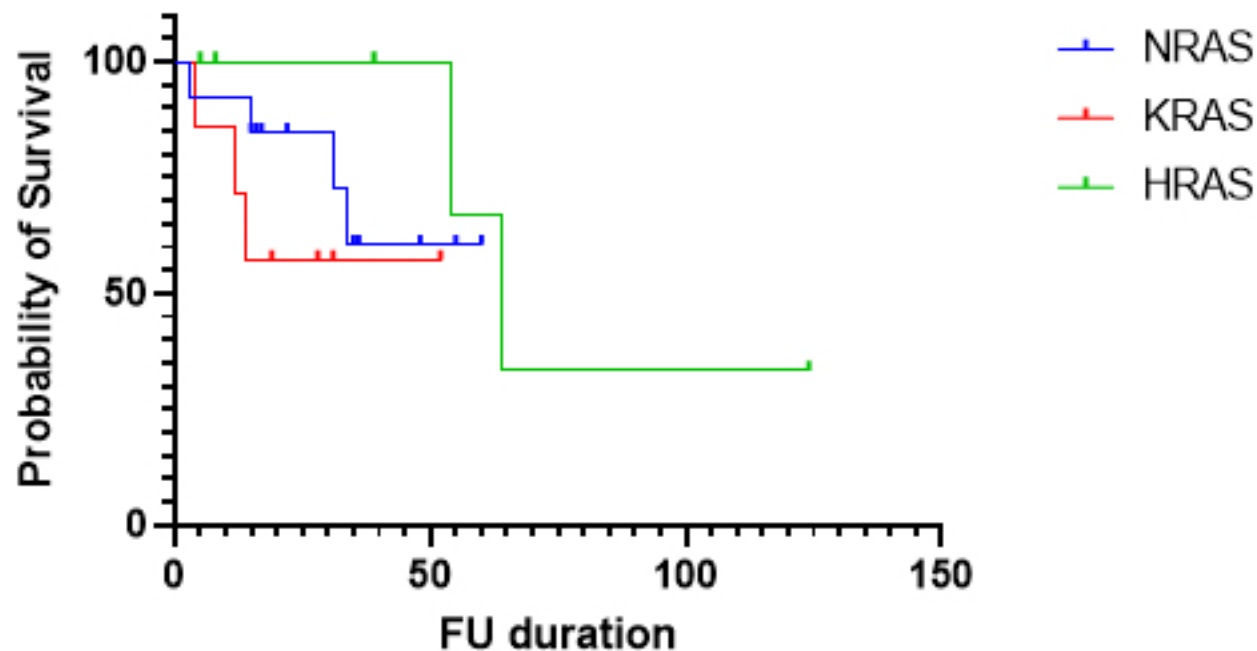

Supplement: NIHMS1787048-supplement-fS2.pdf [file NIHMS1787048-supplement-fS2.pdf]
